# Supplementary material for: Novel Role of 3’UTR-Embedded Alu Elements as Facilitators of Processed Pseudogene Genesis and Host Gene Capture by Viral Genomes
Source: PubMed Central journal article supplement (PMC5199112; doi:10.1371/journal.pone.0169196), 2016-12-29
Supplement: pone.0169196.s001.pdf [file pone.0169196.s001.pdf]

***Homo sapiens* genes with 3'UTR-embedded Alu(s)**

|              |          | <b>Sense</b>                      | <b>Antisense</b>                  | <b>Mix</b>                      | <b>Total</b> |
|--------------|----------|-----------------------------------|-----------------------------------|---------------------------------|--------------|
| <b>PPs</b>   | <b>-</b> | <b>1,249</b> (42.86%)<br>(87.16%) | <b>1,139</b> (39.09%)<br>(84.43%) | <b>526</b> (18.05%)<br>(81.55%) | 2,914        |
|              | <b>+</b> | <b>184</b> (35.87%)<br>(12.84%)   | <b>210</b> (40.93%)<br>(15.57%)   | <b>119</b> (23.20%)<br>(18.45%) | 513          |
| <b>Total</b> |          | 1,433                             | 1,349                             | 645                             | 3,427        |

**$\chi^2$  test P = 0.0030**

**S1 Fig. Contingence table comparing the existence of PPs from human genes that contain 3'UTR-embedded Alus with respect to the orientation of these SINEs.** The genes were grouped in three classes: *sense* (all the 3'UTR-embedded Alu elements have the same sense that the containing gene), *antisense* (all the 3'UTR Alus are in the sense opposite to the gene), and *mix* (3'UTR Alus in both senses). Plus and minus signs on the left mean presence or absence, respectively, of PPs generated from a gene. Numbers in bold are gene counts; total number of genes are also displayed in the right column and the bottom row. Percentages with respect to each total are also shown. P-value of the  $\chi^2$  test is also indicated.
