# Supplementary material for: Novel Role of 3’UTR-Embedded Alu Elements as Facilitators of Processed Pseudogene Genesis and Host Gene Capture by Viral Genomes
Source: PubMed Central journal article supplement (PMC5199112; doi:10.1371/journal.pone.0169196), 2016-12-29
Supplement: pone.0169196.s002.pdf [file pone.0169196.s002.pdf]

***Homo sapiens* genes**

**A**

Alu(s) inside introns

|       |   | -                                 | +                                  | Total  |
|-------|---|-----------------------------------|------------------------------------|--------|
| PPs   | - | <b>2,130</b> (14.25%)<br>(87.65%) | <b>12,820</b> (85.75%)<br>(87.70%) | 14,950 |
|       | + | <b>300</b> (14.30%)<br>(12.35%)   | <b>1798</b> (85.70%)<br>(12.30%)   | 2,098  |
| Total |   | 2,430                             | 14,618                             | 17,048 |

$\chi^2$  test **P = 0.9493**

**B**

5'UTR-embedded Alu

|       |   | -                                  | +                              | Total  |
|-------|---|------------------------------------|--------------------------------|--------|
| PPs   | - | <b>14,655</b> (98.03%)<br>(87.79%) | <b>295</b> (1.97%)<br>(83.33%) | 14,950 |
|       | + | <b>2,039</b> (97.19%)<br>(12.21%)  | <b>59</b> (2.81%)<br>(16.67%)  | 2,098  |
| Total |   | 16,694                             | 354                            | 17,048 |

$\chi^2$  test **P = 0.0116**

**S2 Fig. Contingence tables comparing the presence of Alu elements inside intronic regions or 5'UTRs of human genes and the existence of PPs from these genes.** Plus and minus signs above the tables indicate presence or absence, respectively, of Alu elements inside the introns (**A**) or 5'UTR(s) (**B**) of a gene. Plus and minus signs on the left mean presence or absence, respectively, of PPs generated from a gene. Numbers in bold are gene counts; total number of genes are also displayed in the right column and the bottom row for each table. Percentages with respect to each total are also shown. P-values of the  $\chi^2$  test are indicated below each corresponding table.
