# Supplementary material for: Novel Role of 3’UTR-Embedded Alu Elements as Facilitators of Processed Pseudogene Genesis and Host Gene Capture by Viral Genomes
Source: PubMed Central journal article supplement (PMC5199112; doi:10.1371/journal.pone.0169196), 2016-12-29
Supplement: pone.0169196.s003.pdf [file pone.0169196.s003.pdf]

***Mus musculus/Rattus norvegicus* genes**

**A** 3'UTR-embedded B1 or B2

|       |   | -                                  | +                                 | Total  |
|-------|---|------------------------------------|-----------------------------------|--------|
| PPs   | - | <b>10,354</b> (78.68%)<br>(90.58%) | <b>2,806</b> (21.32%)<br>(86.79%) | 13,160 |
|       | + | <b>1,077</b> (71.61%)<br>(9.42%)   | <b>427</b> (28.39%)<br>(13.21%)   | 1,504  |
| Total |   | 11,431                             | 3,233                             | 14,664 |

$\chi^2$  test P = 3.7e-10

**B** 3'UTR-embedded B1

|       |   | -                                  | +                                 | Total  |
|-------|---|------------------------------------|-----------------------------------|--------|
| PPs   | - | <b>10,828</b> (82.28%)<br>(90.50%) | <b>2,332</b> (17.72%)<br>(86.37%) | 13,160 |
|       | + | <b>1,136</b> (75.53%)<br>(9.50%)   | <b>368</b> (24.47%)<br>(13.63%)   | 1,504  |
| Total |   | 11,964                             | 2,700                             | 14,664 |

$\chi^2$  test P = 1.6e-10

**S3 Fig. Contingence tables showing overrepresentation of Alu-like elements inside 3'UTRs of mouse or rat PP parent genes resulting from the combined analysis of mouse and rat data together.** Plus and minus signs above the tables indicate presence or absence, respectively, of B1 or B2 elements (A), or B1 elements alone (B) inside the 3'UTR(s) of a gene in whatever of the two species. Plus and minus signs on the left mean presence or absence, respectively, of PPs generated from a gene, whether in mouse or rat. Numbers in bold are gene counts; total number of genes are also displayed in the right column and the bottom row for each table. Percentages with respect to each total are also shown. P-values of the  $\chi^2$  test are indicated below each corresponding table.
