# Supplementary material for: Novel Role of 3’UTR-Embedded Alu Elements as Facilitators of Processed Pseudogene Genesis and Host Gene Capture by Viral Genomes
Source: PubMed Central journal article supplement (PMC5199112; doi:10.1371/journal.pone.0169196), 2016-12-29
Supplement: pone.0169196.s004.pdf [file pone.0169196.s004.pdf]

**A** *Mus musculus* genes

|       |   | 3'UTR-embedded B2 (no B1)          |                                | Total  |
|-------|---|------------------------------------|--------------------------------|--------|
|       |   | -                                  | +                              |        |
| PPs   | - | <b>15,935</b> (96.67%)<br>(90.46%) | <b>549</b> (3.33%)<br>(90.74%) | 16,484 |
|       | + | <b>1,680</b> (96.77%)<br>(9.54%)   | <b>56</b> (3.23%)<br>(9.26%)   | 1,736  |
| Total |   | 17,615                             | 605                            | 18,220 |

$\chi^2$  test P = 0.8169

**B** *Rattus norvegicus* genes

|       |   | 3'UTR-embedded B2 (no B1)          |                                | Total  |
|-------|---|------------------------------------|--------------------------------|--------|
|       |   | -                                  | +                              |        |
| PPs   | - | <b>18,839</b> (98.80%)<br>(94.79%) | <b>228</b> (1.20%)<br>(93.44%) | 19,067 |
|       | + | <b>1,035</b> (98.48%)<br>(5.21%)   | <b>16</b> (1.52%)<br>(6.56%)   | 1,051  |
| Total |   | 19,874                             | 244                            | 20,118 |

$\chi^2$  test P = 0.3464

**S4 Fig. Contingence tables showing that B2 elements are not over or underrepresented inside 3'UTRs of mouse (A) or rat PP (B) parent genes.** Plus and minus signs above the tables indicate presence or absence, respectively, of B2 elements alone (in absence of B1 elements) inside the 3'UTR(s) of a gene. Plus and minus signs on the left mean presence or absence, respectively, of PPs generated from a gene. Numbers in bold are gene counts; total number of genes are also displayed in the right column and the bottom row for each table. Percentages with respect to each total are also shown. P-values of the  $\chi^2$  test are indicated below each corresponding table.
