# Supplementary material for: Novel Role of 3’UTR-Embedded Alu Elements as Facilitators of Processed Pseudogene Genesis and Host Gene Capture by Viral Genomes
Source: PubMed Central journal article supplement (PMC5199112; doi:10.1371/journal.pone.0169196), 2016-12-29
Supplement: pone.0169196.s005.pdf [file pone.0169196.s005.pdf]

***Mus musculus* genes**

**A**

B1(s) inside introns

|       |   | -                                 | +                                  | Total  |
|-------|---|-----------------------------------|------------------------------------|--------|
| PPs   | - | <b>3,255</b> (19.75%)<br>(90.12%) | <b>13,229</b> (80.25%)<br>(90.56%) | 16,484 |
|       | + | <b>357</b> (20.56%)<br>(9.88%)    | <b>1379</b> (79.44%)<br>(9.44%)    | 1,736  |
| Total |   | 3,612                             | 14,608                             | 18,220 |

$\chi^2$  test **P = 0.4161**

**B**

5'UTR-embedded B1

|       |   | -                                  | +                              | Total  |
|-------|---|------------------------------------|--------------------------------|--------|
| PPs   | - | <b>16,366</b> (99.28%)<br>(90.51%) | <b>118</b> (0.72%)<br>(85.51%) | 16,484 |
|       | + | <b>1,716</b> (98.85%)<br>(9.49%)   | <b>20</b> (1.15%)<br>(14.49%)  | 1,736  |
| Total |   | 18,082                             | 138                            | 18,220 |

$\chi^2$  test **P = 0.0461**

**S5 Fig. Contingence tables comparing the presence of B1 elements inside intronic regions or 5'UTRs of mouse genes and the existence of PPs from these genes.** Plus and minus signs above the tables indicate presence or absence, respectively, of B1 elements inside the introns (**A**) or 5'UTR(s) (**B**) of a gene. Plus and minus signs on the left mean presence or absence, respectively, of PPs generated from a gene. Numbers in bold are gene counts; total number of genes are also displayed in the right column and the bottom row for each table. Percentages with respect to each total are also shown. P-values of the  $\chi^2$  test are indicated below each corresponding table.
