# Supplementary material for: Novel Role of 3’UTR-Embedded Alu Elements as Facilitators of Processed Pseudogene Genesis and Host Gene Capture by Viral Genomes
Source: PubMed Central journal article supplement (PMC5199112; doi:10.1371/journal.pone.0169196), 2016-12-29
Supplement: pone.0169196.s007.pdf [file pone.0169196.s007.pdf]

**Sample 1**

Equal transcript length distribution (P=0.75, MWW test)

|       |   | 3'UTR-embedded Alu       |                          | Total |
|-------|---|--------------------------|--------------------------|-------|
|       |   | -                        | +                        |       |
| PPs   | - | <b>3,125</b><br>(91.19%) | <b>2,914</b><br>(85.03%) | 6,039 |
|       | + | <b>302</b><br>(8.81%)    | <b>513</b><br>(14.97%)   | 815   |
| Total |   | 3,427                    | 3,427                    | 6,854 |

 $\chi^2$  test P = 3.4e-15**Sample 2**

Equal transcript length distribution (P=0.72, MWW test)

|       |   | 3'UTR-embedded Alu       |                          | Total |
|-------|---|--------------------------|--------------------------|-------|
|       |   | -                        | +                        |       |
| PPs   | - | <b>3,131</b><br>(91.36%) | <b>2,914</b><br>(85.03%) | 6,045 |
|       | + | <b>296</b><br>(8.64%)    | <b>513</b><br>(14.97%)   | 809   |
| Total |   | 3,427                    | 3,427                    | 6,854 |

 $\chi^2$  test P = 4.5e-16**Sample 3**

Equal transcript length distribution (P=0.72, MWW test)

|       |   | 3'UTR-embedded Alu       |                          | Total |
|-------|---|--------------------------|--------------------------|-------|
|       |   | -                        | +                        |       |
| PPs   | - | <b>3,141</b><br>(91.86%) | <b>2,914</b><br>(85.03%) | 6,055 |
|       | + | <b>286</b><br>(8.35%)    | <b>513</b><br>(14.97%)   | 799   |
| Total |   | 3,427                    | 3,427                    | 6,854 |

 $\chi^2$  test P = 1.3e-17**Sample 4**

Equal transcript length distribution (P=0.55, MWW test)

|       |   | 3'UTR-embedded Alu       |                          | Total |
|-------|---|--------------------------|--------------------------|-------|
|       |   | -                        | +                        |       |
| PPs   | - | <b>3,148</b><br>(91.86%) | <b>2,914</b><br>(85.03%) | 6,062 |
|       | + | <b>279</b><br>(8.14%)    | <b>513</b><br>(14.97%)   | 792   |
| Total |   | 3,427                    | 3,427                    | 6,854 |

 $\chi^2$  test P = 9.5e-19**Sample 5**

Equal transcript length distribution (P=0.79, MWW test)

|       |   | 3'UTR-embedded Alu       |                          | Total |
|-------|---|--------------------------|--------------------------|-------|
|       |   | -                        | +                        |       |
| PPs   | - | <b>3,151</b><br>(91.95%) | <b>2,914</b><br>(85.03%) | 6,065 |
|       | + | <b>276</b><br>(8.05%)    | <b>513</b><br>(14.97%)   | 789   |
| Total |   | 3,427                    | 3,427                    | 6,854 |

 $\chi^2$  test P = 3.0e-19**Sample 6**

Equal transcript length distribution (P=0.66, MWW test)

|       |   | 3'UTR-embedded Alu       |                          | Total |
|-------|---|--------------------------|--------------------------|-------|
|       |   | -                        | +                        |       |
| PPs   | - | <b>3,131</b><br>(91.36%) | <b>2,914</b><br>(85.03%) | 6,045 |
|       | + | <b>296</b><br>(8.64%)    | <b>513</b><br>(14.97%)   | 809   |
| Total |   | 3,427                    | 3,427                    | 6,854 |

 $\chi^2$  test P = 4.5e-16**Sample 7**

Equal transcript length distribution (P=0.70, MWW test)

|       |   | 3'UTR-embedded Alu       |                          | Total |
|-------|---|--------------------------|--------------------------|-------|
|       |   | -                        | +                        |       |
| PPs   | - | <b>3,149</b><br>(91.19%) | <b>2,914</b><br>(85.03%) | 6,063 |
|       | + | <b>278</b><br>(8.1%)     | <b>513</b><br>(14.97%)   | 791   |
| Total |   | 3,427                    | 3,427                    | 6,854 |

 $\chi^2$  test P = 6.5e-19**Sample 8**

Equal transcript length distribution (P=0.71, MWW test)

|       |   | 3'UTR-embedded Alu       |                          | Total |
|-------|---|--------------------------|--------------------------|-------|
|       |   | -                        | +                        |       |
| PPs   | - | <b>3,135</b><br>(91.48%) | <b>2,914</b><br>(85.03%) | 6,049 |
|       | + | <b>292</b><br>(8.52%)    | <b>513</b><br>(14.97%)   | 805   |
| Total |   | 3,427                    | 3,427                    | 6,854 |

 $\chi^2$  test P = 1.1e-16**Sample 9**

Equal transcript length distribution (P=0.69, MWW test)

|       |   | 3'UTR-embedded Alu       |                          | Total |
|-------|---|--------------------------|--------------------------|-------|
|       |   | -                        | +                        |       |
| PPs   | - | <b>3,141</b><br>(91.65%) | <b>2,914</b><br>(85.03%) | 6,055 |
|       | + | <b>286</b><br>(8.35%)    | <b>513</b><br>(14.97%)   | 799   |
| Total |   | 3,427                    | 3,427                    | 6,854 |

 $\chi^2$  test P = 1.3e-17**Sample 10**

Equal transcript length distribution (P=0.76, MWW test)

|       |   | 3'UTR-embedded Alu       |                          | Total |
|-------|---|--------------------------|--------------------------|-------|
|       |   | -                        | +                        |       |
| PPs   | - | <b>3,127</b><br>(91.25%) | <b>2,914</b><br>(85.03%) | 6,041 |
|       | + | <b>300</b><br>(8.75%)    | <b>513</b><br>(14.97%)   | 813   |
| Total |   | 3,427                    | 3,427                    | 6,854 |

 $\chi^2$  test P = 1.8e-15

**S7 Fig. Sampling analysis to separate the possible effect of the transcript length on the overrepresentation of 3'UTR-embedded Alu elements in PP parent genes.** Ten samples were generated. For each sample, Mann-Whitney-Wilcoxon (MWW) test proved that both gene sets (Alu+ and sampled Alu-) have a similar transcript length distribution and a contingency table showed overrepresentation of 3'UTR-embedded Alu elements in PP parent genes ( $\chi^2$  tested). Plus and minus signs above the tables indicate presence or absence, respectively, of Alus inside the 3'UTR(s) of a gene. Plus and minus signs on the left of the tables mean presence or absence, respectively, of PPs generated from a gene. Numbers in bold are gene counts; total number of genes are also displayed in the right column and the bottom row for each table. Percentages with respect to each total are also shown. P-values of the  $\chi^2$  test are indicated below each corresponding table. See Materials and Methods for details.
