# Supplementary material for: Novel Role of 3’UTR-Embedded Alu Elements as Facilitators of Processed Pseudogene Genesis and Host Gene Capture by Viral Genomes
Source: PubMed Central journal article supplement (PMC5199112; doi:10.1371/journal.pone.0169196), 2016-12-29
Supplement: pone.0169196.s008.pdf [file pone.0169196.s008.pdf]

**Sample 1**

Equal GC-content distribution (P=0.99, MWW test)

|       |   | 3'UTR-embedded Alu       |                          | Total |
|-------|---|--------------------------|--------------------------|-------|
|       |   | -                        | +                        |       |
| PPs   | - | <b>2,997</b><br>(87.45%) | <b>2,914</b><br>(85.03%) | 5,911 |
|       | + | <b>430</b><br>(12.55%)   | <b>513</b><br>(14.97%)   | 943   |
| Total |   | 3,427                    | 3,427                    | 6,854 |

 $\chi^2$  test P = 0.0036**Sample 2**

Equal GC-content distribution (P=0.96, MWW test)

|       |   | 3'UTR-embedded Alu       |                          | Total |
|-------|---|--------------------------|--------------------------|-------|
|       |   | -                        | +                        |       |
| PPs   | - | <b>3,017</b><br>(88.04%) | <b>2,914</b><br>(85.03%) | 5,931 |
|       | + | <b>410</b><br>(11.96%)   | <b>513</b><br>(14.97%)   | 923   |
| Total |   | 3,427                    | 3,427                    | 6,854 |

 $\chi^2$  test P = 0.0003**Sample 3**

Equal GC-content distribution (P=0.94, MWW test)

|       |   | 3'UTR-embedded Alu       |                          | Total |
|-------|---|--------------------------|--------------------------|-------|
|       |   | -                        | +                        |       |
| PPs   | - | <b>2,979</b><br>(86.93%) | <b>2,914</b><br>(85.03%) | 5,893 |
|       | + | <b>448</b><br>(13.07%)   | <b>513</b><br>(14.97%)   | 961   |
| Total |   | 3,427                    | 3,427                    | 6,854 |

 $\chi^2$  test P = 0.0237**Sample 4**

Equal GC-content distribution (P=0.96, MWW test)

|       |   | 3'UTR-embedded Alu       |                          | Total |
|-------|---|--------------------------|--------------------------|-------|
|       |   | -                        | +                        |       |
| PPs   | - | <b>2,986</b><br>(87.13%) | <b>2,914</b><br>(85.03%) | 5,900 |
|       | + | <b>441</b><br>(12.87%)   | <b>513</b><br>(14.97%)   | 954   |
| Total |   | 3,427                    | 3,427                    | 6,854 |

 $\chi^2$  test P = 0.0120**Sample 5**

Equal GC-content distribution (P=0.93, MWW test)

|       |   | 3'UTR-embedded Alu       |                          | Total |
|-------|---|--------------------------|--------------------------|-------|
|       |   | -                        | +                        |       |
| PPs   | - | <b>2,994</b><br>(87.37%) | <b>2,914</b><br>(85.03%) | 5,908 |
|       | + | <b>433</b><br>(12.63%)   | <b>513</b><br>(14.97%)   | 946   |
| Total |   | 3,427                    | 3,427                    | 6,854 |

 $\chi^2$  test P = 0.0051**Sample 6**

Equal GC-content distribution (P=0.99, MWW test)

|       |   | 3'UTR-embedded Alu       |                          | Total |
|-------|---|--------------------------|--------------------------|-------|
|       |   | -                        | +                        |       |
| PPs   | - | <b>2,998</b><br>(87.48%) | <b>2,914</b><br>(85.03%) | 5,912 |
|       | + | <b>429</b><br>(12.52%)   | <b>513</b><br>(14.97%)   | 942   |
| Total |   | 3,427                    | 3,427                    | 6,854 |

 $\chi^2$  test P = 0.0032**Sample 7**

Equal GC-content distribution (P=0.99, MWW test)

|       |   | 3'UTR-embedded Alu       |                          | Total |
|-------|---|--------------------------|--------------------------|-------|
|       |   | -                        | +                        |       |
| PPs   | - | <b>2,997</b><br>(87.45%) | <b>2,914</b><br>(85.03%) | 5,911 |
|       | + | <b>430</b><br>(12.55%)   | <b>513</b><br>(14.97%)   | 943   |
| Total |   | 3,427                    | 3,427                    | 6,854 |

 $\chi^2$  test P = 0.0036**Sample 8**

Equal GC-content distribution (P=0.97, MWW test)

|       |   | 3'UTR-embedded Alu       |                          | Total |
|-------|---|--------------------------|--------------------------|-------|
|       |   | -                        | +                        |       |
| PPs   | - | <b>3,003</b><br>(87.63%) | <b>2,914</b><br>(85.03%) | 5,917 |
|       | + | <b>424</b><br>(12.37%)   | <b>513</b><br>(14.97%)   | 937   |
| Total |   | 3,427                    | 3,427                    | 6,854 |

 $\chi^2$  test P = 0.0018**Sample 9**

Equal GC-content distribution (P=1.00, MWW test)

|       |   | 3'UTR-embedded Alu       |                          | Total |
|-------|---|--------------------------|--------------------------|-------|
|       |   | -                        | +                        |       |
| PPs   | - | <b>2,980</b><br>(86.96%) | <b>2,914</b><br>(85.03%) | 5,894 |
|       | + | <b>447</b><br>(13.04%)   | <b>513</b><br>(14.97%)   | 960   |
| Total |   | 3,427                    | 3,427                    | 6,854 |

 $\chi^2$  test P = 0.0216**Sample 10**

Equal GC-content distribution (P=0.96, MWW test)

|       |   | 3'UTR-embedded Alu       |                          | Total |
|-------|---|--------------------------|--------------------------|-------|
|       |   | -                        | +                        |       |
| PPs   | - | <b>3,001</b><br>(87.57%) | <b>2,914</b><br>(85.03%) | 5,915 |
|       | + | <b>426</b><br>(12.43%)   | <b>513</b><br>(14.97%)   | 939   |
| Total |   | 3,427                    | 3,427                    | 6,854 |

 $\chi^2$  test P = 0.0022

**S8 Fig. Sampling analysis to separate the possible effect of the GC-content on the overrepresentation of 3'UTR-embedded Alu elements in PP parent genes.** Ten samples were generated. For each sample, Mann-Whitney-Wilcoxon (MWW) test proved that both gene sets (Alu+ and sampled Alu-) have a similar GC-content distribution and a contingency table showed overrepresentation of 3'UTR-embedded Alu elements in PP parent genes ( $\chi^2$  tested). Plus and minus signs above the tables indicate presence or absence, respectively, of Alus inside the 3'UTR(s) of a gene. Plus and minus signs on the left of the tables mean presence or absence, respectively, of PPs generated from a gene. Numbers in bold are gene counts; total number of genes are also displayed in the right column and the bottom row for each table. Percentages with respect to each total are also shown. P-values of the  $\chi^2$  test are indicated below each corresponding table. See Materials and Methods for details.
