# Supplementary material for: Novel Role of 3’UTR-Embedded Alu Elements as Facilitators of Processed Pseudogene Genesis and Host Gene Capture by Viral Genomes
Source: PubMed Central journal article supplement (PMC5199112; doi:10.1371/journal.pone.0169196), 2016-12-29
Supplement: pone.0169196.s017.pdf [file pone.0169196.s017.pdf]

**S5 Table. GenBank IDs of the primate host and viral protein sequences aligned.**

| Host Gene           | Host Species               | Host Protein ID | Viral Gene   | Viral Species                                              | Viral Protein ID |
|---------------------|----------------------------|-----------------|--------------|------------------------------------------------------------|------------------|
| <i>IL10</i>         | <i>Macaca fascicularis</i> | XP_005540710    | <i>BCRF1</i> | Lymphocryptovirus Macaca                                   | ALF03208         |
| <i>IL10</i>         | <i>Macaca mulatta</i>      | NP_001038192    | <i>BCRF1</i> | Macacine Herpesvirus 4                                     | YP_067941        |
| <i>IL10</i>         | <i>Homo sapiens</i>        | NP_000563       | <i>BCRF1</i> | Epstein-Barr Virus (EBV)                                   | YP_001129439     |
| <i>IL10</i>         | <i>Papio anubis</i>        | XP_003893246    | <i>vIL10</i> | Papiine Herpesvirus 1                                      | AAF23949         |
| <i>DHFR</i>         | <i>Saimiri boliviensis</i> | XP_010340850    | <i>ORF2</i>  | Herpesvirus Saimiri (HVS)                                  | NP_040203        |
| <i>DHFR</i>         | <i>Macaca nemestrina</i>   | XP_011728325    | <i>ORF2</i>  | Macaca nemestrina Rhadinovirus 2 (MneRV2)                  | AJE29641         |
| <i>SLAMF6</i>       | <i>Saimiri boliviensis</i> | - <sup>a</sup>  | <i>SI</i>    | Squirrel Monkey Cytomegalovirus (SMCMV)                    | YP_004940177     |
| <i>IL17A</i>        | <i>Saimiri boliviensis</i> | XP_003923160    | <i>ORF13</i> | Herpesvirus Saimiri (HVS)                                  | NP_040215        |
| <i>TYMS</i>         | <i>Macaca mulatta</i>      | NP_001182436    | <i>ORF13</i> | Simian Varicella Virus (SVV)                               | NP_077428        |
| <i>TYMS</i>         | <i>Aotus nancymae</i>      | XP_012300458    | <i>ORF70</i> | Ateline Herpesvirus 3 (AtHV3)                              | NP_048042        |
| <i>TYMS</i>         | <i>Saimiri boliviensis</i> | XP_003924847    | <i>ORF70</i> | Herpesvirus Saimiri (HVS)                                  | NP_040272        |
| <i>TYMS</i>         | <i>Homo sapiens</i>        | NP_001062       | <i>ORF13</i> | Varicella Zoster Virus (VZV)                               | AKG58489         |
| <i>TYMS</i>         | <i>Homo sapiens</i>        | NP_001062       | <i>ORF70</i> | Kaposi's Sarcoma-associated Herpesvirus (KSHV)             | ALH44776         |
| <i>TYMS</i>         | <i>Macaca mulatta</i>      | NP_001182436    | <i>ORF70</i> | Rhesus Monkey Rhadinovirus (RRV)                           | AAF59999         |
| <i>TYMS</i>         | <i>Macaca nemestrina</i>   | XP_011711015    | <i>ORF70</i> | Macaca nemestrina Rhadinovirus 2 (MneRV2)                  | AJE29652         |
| <i>TYMS</i>         | <i>Macaca nemestrina</i>   | XP_011711015    | <i>ORF70</i> | Retroperitoneal Fibromatosis-associated Herpesvirus (RFHV) | AGY30693         |
| <i>CD59</i>         | <i>Saimiri boliviensis</i> | XP_010331578    | <i>ORF15</i> | Herpesvirus Saimiri (HVS)                                  | NP_040217        |
| <i>LOC101037697</i> | <i>Saimiri boliviensis</i> | XP_010335696    | <i>S28</i>   | Squirrel Monkey Cytomegalovirus (SMCMV)                    | YP_004940312     |
| <i>LY9</i>          | <i>Aotus nancymae</i>      | XP_012305076    | <i>A33</i>   | Owl Monkey Cytomegalovirus (OMCMV)                         | YP_004940161     |
| <i>CD48</i>         | <i>Aotus nancymae</i>      | XP_012305080    | <i>A43</i>   | Owl Monkey Cytomegalovirus (OMCMV)                         | YP_004940172     |

<sup>a</sup>*S. boliviensis* SLAMF6 protein sequence was predicted from the genome. As this region is not completely sequenced, there are 52 amino acids missed that were extrapolated from the *A. nancymae* SLAMF6 protein (XP\_012305082).
