# Supplementary material for: Novel Role of 3’UTR-Embedded Alu Elements as Facilitators of Processed Pseudogene Genesis and Host Gene Capture by Viral Genomes
Source: PubMed Central journal article supplement (PMC5199112; doi:10.1371/journal.pone.0169196), 2016-12-29
Supplement: pone.0169196.s018.pdf [file pone.0169196.s018.pdf]

**S6 Table. IDs of the DNA sequences used in the phylogenetics analysis.**

| <b>Species</b>                        | <b>Gene</b>  | <b>GenBank or Ensembl ID</b> |
|---------------------------------------|--------------|------------------------------|
| <u>IL17A phylogenetic tree</u>        |              |                              |
| <i>Homo sapiens</i>                   | <i>IL17A</i> | NM_002190                    |
| <i>Pan paniscus</i>                   | <i>IL17A</i> | XM_003833162                 |
| <i>Pan troglodytes</i>                | <i>IL17A</i> | XM_527408                    |
| <i>Gorilla gorilla</i>                | <i>IL17A</i> | XM_004044183                 |
| <i>Pongo abelii</i>                   | <i>IL17A</i> | XM_002816996                 |
| <i>Nomascus leucogenys</i>            | <i>IL17A</i> | XM_003254163                 |
| <i>Macaca fascicularis</i>            | <i>IL17A</i> | XM_005552759                 |
| <i>Macaca nemestrina</i>              | <i>IL17A</i> | XM_011756846                 |
| <i>Macaca mulatta</i>                 | <i>IL17A</i> | XM_001106391                 |
| <i>Papio anubis</i>                   | <i>IL17A</i> | XM_003897728                 |
| <i>Callithrix jacchus</i>             | <i>IL17A</i> | XM_002746684                 |
| <i>Saimiri boliviensis</i>            | <i>IL17A</i> | XM_003923111                 |
| <i>Microcebus murinus</i>             | <i>IL17A</i> | XM_012760842                 |
| <i>Mus musculus</i>                   | <i>Il17a</i> | NM_010552                    |
| <i>Rattus norvegicus</i>              | <i>Il17a</i> | NM_001106897                 |
| Herpesvirus saimiri (HVS)             | <i>ORF13</i> | NC_001350                    |
| Herpesvirus saimiri (HVS) strain C488 | <i>ORF13</i> | AJ410493                     |
| <u>CD59 phylogenetic tree</u>         |              |                              |
| <i>Homo sapiens</i>                   | <i>CD59</i>  | NM_203330                    |
| <i>Pan paniscus</i>                   | <i>CD59</i>  | XM_008955860                 |
| <i>Pan troglodytes</i>                | <i>CD59</i>  | XM_009460159                 |
| <i>Gorilla gorilla</i>                | <i>CD59</i>  | XM_004050913                 |
| <i>Pongo abelii</i>                   | <i>CD59</i>  | NM_001133389                 |
| <i>Nomascus leucogenys</i>            | <i>CD59</i>  | XM_003254387                 |
| <i>Macaca fascicularis</i>            | <i>CD59</i>  | NM_001283527                 |
| <i>Macaca nemestrina</i>              | <i>CD59</i>  | XM_011724034                 |
| <i>Macaca mulatta</i>                 | <i>CD59</i>  | NM_001261705                 |
| <i>Papio anubis</i>                   | <i>CD59</i>  | XM_009186334                 |
| <i>Callithrix jacchus</i>             | <i>CD59</i>  | XM_002755162                 |
| <i>Saimiri boliviensis</i>            | <i>CD59</i>  | XM_010333276                 |
| <i>Microcebus murinus</i>             | <i>CD59</i>  | XM_012739886                 |
| <i>Mus musculus</i>                   | <i>Cd59</i>  | NM_001111060                 |
| <i>Rattus norvegicus</i>              | <i>Cd59</i>  | NM_012925                    |
| Herpesvirus saimiri (HVS)             | <i>ORF15</i> | NC_001350                    |
| Herpesvirus saimiri (HVS) strain C488 | <i>ORF15</i> | AJ410493                     |
| <u>TYMS phylogenetic tree</u>         |              |                              |
| <i>Homo sapiens</i>                   | <i>TYMS</i>  | NM_001071                    |
| <i>Pan troglodytes</i>                | <i>TYMS</i>  | NM_001246582                 |
| <i>Pongo abelii</i>                   | <i>TYMS</i>  | ENSPPYT00000033303           |
| <i>Macaca mulatta</i>                 | <i>TYMS</i>  | NM_001195507                 |
| <i>Papio anubis</i>                   | <i>TYMS</i>  | ENSPANT00000022270           |
| <i>Callithrix jacchus</i>             | <i>TYMS</i>  | ENSCJAT00000000247           |
| <i>Otolemur garnettii</i>             | <i>TYMS</i>  | ENSOGAT00000033315           |
| <i>Bos taurus</i>                     | <i>TYMS</i>  | NM_001037816                 |
| <i>Ovis aries</i>                     | <i>TYMS</i>  | ENSOART00000010195           |
| <i>Sus scrofa</i>                     | <i>TYMS</i>  | NM_001243579                 |
| <i>Equus caballus</i>                 | <i>TYMS</i>  | ENSECAT00000024973           |
| <i>Canis lupus familiaris</i>         | <i>TYMS</i>  | NM_001252174                 |

**S6 Table. IDs of the DNA sequences used in the phylogenetics analysis. (cont.)**

| <b>Species</b>                                             | <b>Gene</b>  | <b>GenBank or Ensembl ID</b> |
|------------------------------------------------------------|--------------|------------------------------|
| <i>Mustela putorius furo</i>                               | <i>TYMS</i>  | ENSMPUT00000005469           |
| <i>Spermophilus tridecemlineatus</i>                       | <i>TYMS</i>  | ENSSTOT00000000908           |
| <i>Pteropus vampyrus</i>                                   | <i>TYMS</i>  | ENSPVAT00000000700           |
| <i>Myotis lucifugus</i>                                    | <i>TYMS</i>  | ENSMLUT00000009583           |
| <i>Loxodonta africana</i>                                  | <i>TYMS</i>  | ENSLAFT00000014909           |
| <i>Dasypus novemcinctus</i>                                | <i>TYMS</i>  | ENSDNOT00000043823           |
| <i>Oryctolagus cuniculus</i>                               | <i>TYMS</i>  | ENSOCUT00000008664           |
| <i>Cavia porcellus</i>                                     | <i>TYMS</i>  | ENSCPOT00000015726           |
| <i>Mus musculus</i>                                        | <i>Tyms</i>  | NM_021288                    |
| <i>Rattus norvegicus</i>                                   | <i>Tyms</i>  | NM_019179                    |
| <i>Sarcophilus harrisi</i>                                 | <i>TYMS</i>  | ENSSHAT00000003568           |
| <i>Ornithorhynchus anatinus</i>                            | <i>TYMS</i>  | ENSOANT00000018418           |
| <i>Latimeria chalumnae</i>                                 | <i>TYMS</i>  | ENSLACT00000018651           |
| <i>Gallus gallus</i>                                       | <i>TYMS</i>  | ENSGALT00000024028           |
| <i>Anolis carolinensis</i>                                 | <i>TYMS</i>  | ENSACAT00000008476           |
| <i>Oryzias latipes</i>                                     | <i>tyms</i>  | ENSORLT00000013877           |
| <i>Gasterosteus aculeatus</i>                              | <i>tyms</i>  | ENSGACT00000005429           |
| <i>Danio rerio</i>                                         | <i>tyms</i>  | NM_131760                    |
| <i>Petromyzon marinus</i>                                  | <i>tyms</i>  | ENSPMAT00000007617           |
| <i>Xenopus tropicalis</i>                                  | <i>tyms</i>  | NM_001079384                 |
| <i>Caenorhabditis elegans</i>                              | <i>tyms1</i> | NM_059131                    |
| Macropodid herpesvirus 1 (MaHV1)                           | <i>TS</i>    | AF188480                     |
| Equid herpesvirus 2 (EHV2)                                 | <i>ORF70</i> | NC_001650                    |
| Equid herpesvirus 5 (EHV5)                                 | <i>ORF70</i> | NC_026421                    |
| Kaposi's sarcoma-associated herpesvirus (KSHV) strain GK18 | <i>ORF70</i> | NC_009333                    |
| Kaposi's sarcoma-associated herpesvirus (KSHV) type M      | <i>ORF70</i> | U75698                       |
| Retroperitoneal fibromatosis-associated herpesvirus (RFHV) | <i>ORF70</i> | KF703446                     |
| Macaca nemestrina rhadinovirus 2 (MneRV2)                  | <i>ORF70</i> | KP265674                     |
| Rhesus macaque rhadinovirus (RRV) strain 12E2              | <i>ORF70</i> | JN885137                     |
| Rhesus macaque rhadinovirus (RRV) strain 3A1               | <i>ORF70</i> | JN885136                     |
| Rhesus macaque rhadinovirus (RRV) strain 17577             | <i>ORF70</i> | AF083501                     |
| Rhesus macaque rhadinovirus (RRV) strain 26-95             | <i>ORF70</i> | AF210726                     |
| Varicella-zoster virus (VZV)                               | <i>ORF13</i> | NC_001348                    |
| Simian varicella virus (SVV)                               | <i>ORF13</i> | NC_002686                    |
| Herpesvirus saimiri (HVS)                                  | <i>ORF70</i> | NC_001350                    |
| Herpesvirus saimiri (HVS) strain C488                      | <i>ORF70</i> | AJ410493                     |
| Ateline herpesvirus 2 (AtHV2)                              | <i>TS</i>    | M22036                       |
| Ateline herpesvirus 3 (AtHV3)                              | <i>ORF70</i> | NC_001987                    |
